# Supplementary material for: Recapitulation of Ayurveda constitution types by machine learning of phenotypic traits
Source: PLOS journal article supplement (doi:10.1371/journal.pone.0185380), 2017-10-05
Supplement: S1 (10.1371/journal.pone.0185380.s001) [file journal.pone.0185380.s001]

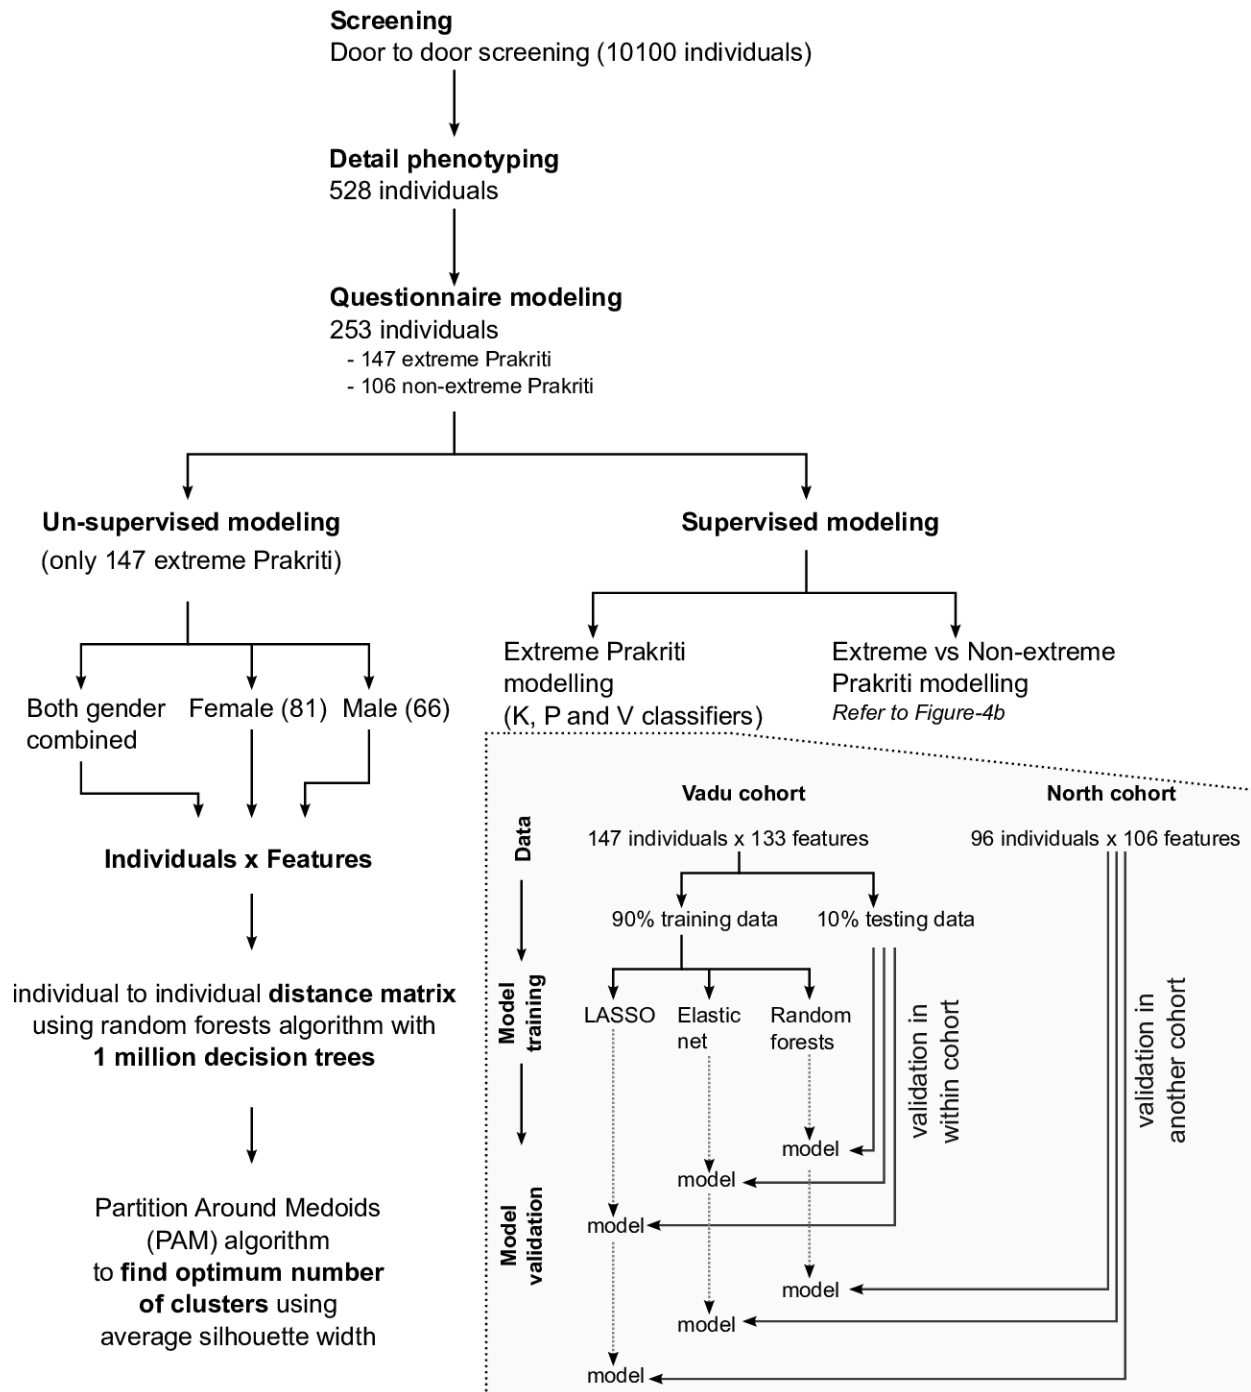

**Supplementary figure S1: Flow chart depicting all the steps employed in the manuscript.**
