# Supplementary material for: Recapitulation of Ayurveda constitution types by machine learning of phenotypic traits
Source: PLOS journal article supplement (doi:10.1371/journal.pone.0185380), 2017-10-05
Supplement: S4 (10.1371/journal.pone.0185380.s004) [file journal.pone.0185380.s004]

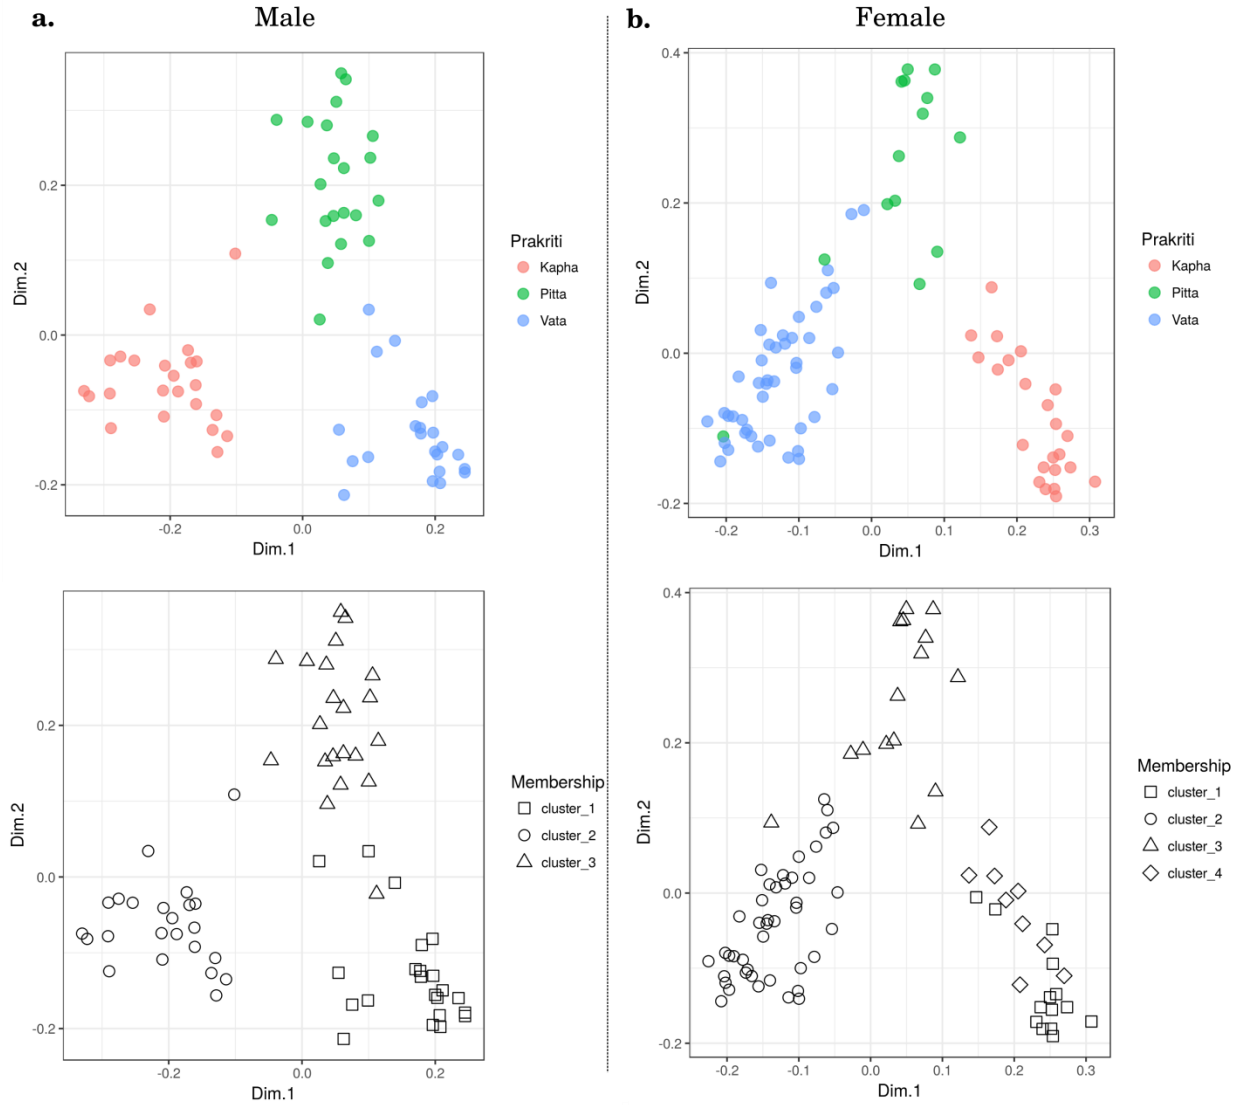

**Supplementary figures S4:** MDS plot of unsupervised clustering using random forests performed on male (4a) and female (4b) extreme *Prakriti* subjects separately. In the case of male subjects three clusters were found (bottom panel, left) while in case of female samples four clusters were found (bottom panel, right).
