# Supplementary material for: Recapitulation of Ayurveda constitution types by machine learning of phenotypic traits
Source: PLOS journal article supplement (doi:10.1371/journal.pone.0185380), 2017-10-05
Supplement: S6 (10.1371/journal.pone.0185380.s006) [file journal.pone.0185380.s006]

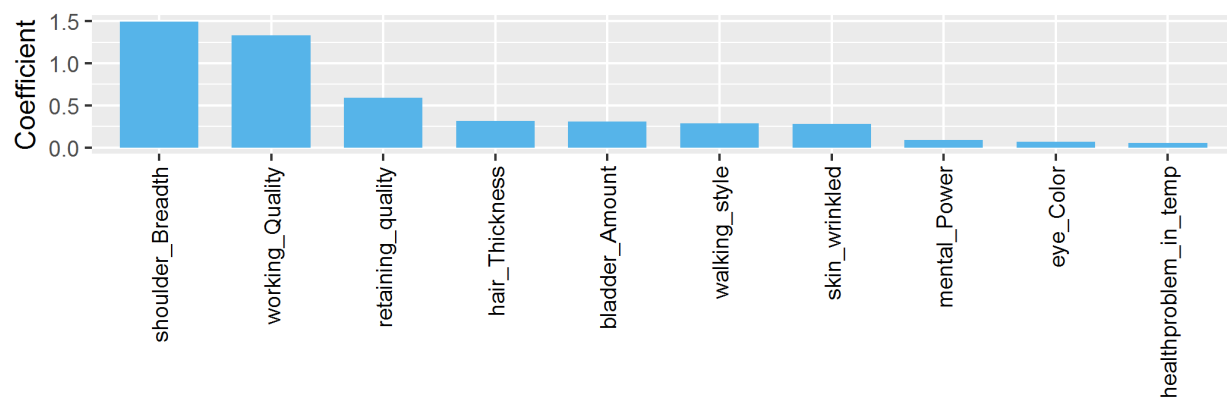

Kapha

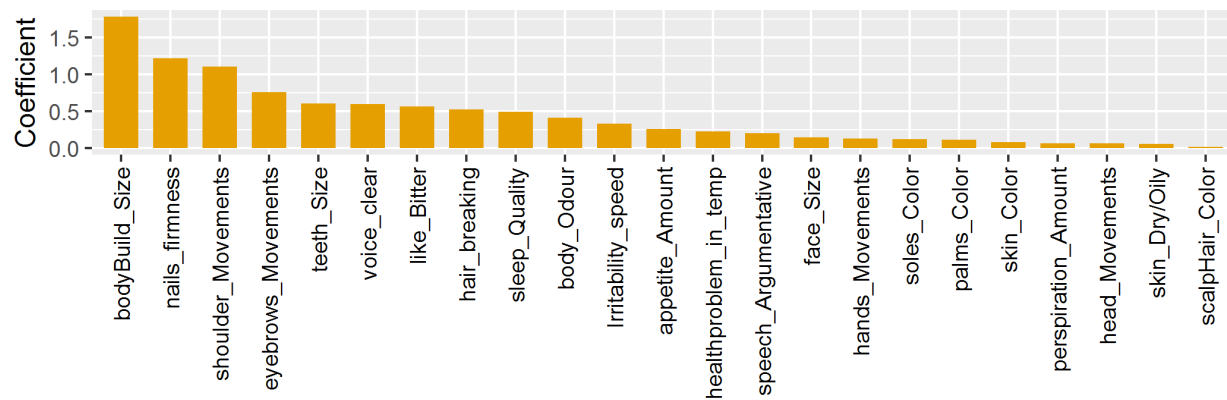

Pitta

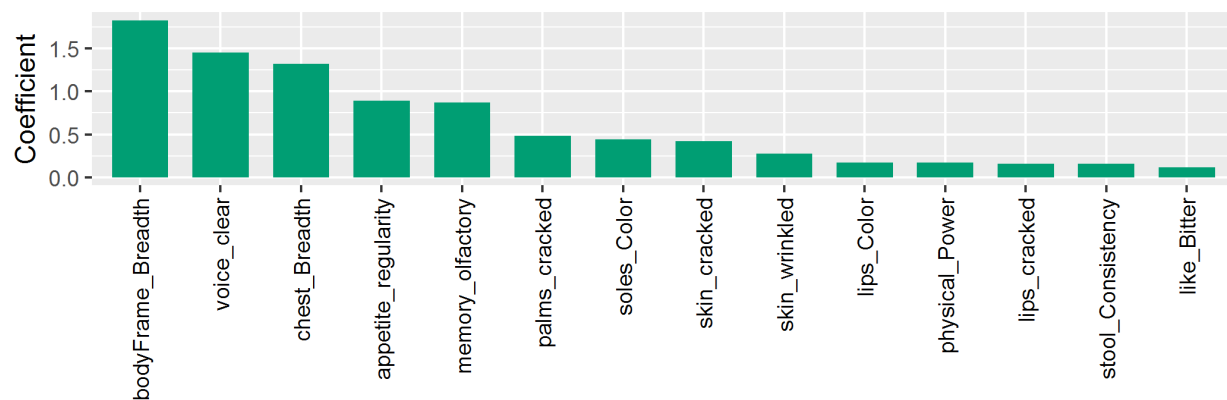

Vata

**Figure S6: Important variable plot for 39 variables from LASSO model:** Y-axis represents the absolute value of the coefficients for the features selected from the lasso model.
