# Supplementary material for: Recapitulation of Ayurveda constitution types by machine learning of phenotypic traits
Source: PLOS journal article supplement (doi:10.1371/journal.pone.0185380), 2017-10-05
Supplement: S7 (10.1371/journal.pone.0185380.s007) [file journal.pone.0185380.s007]

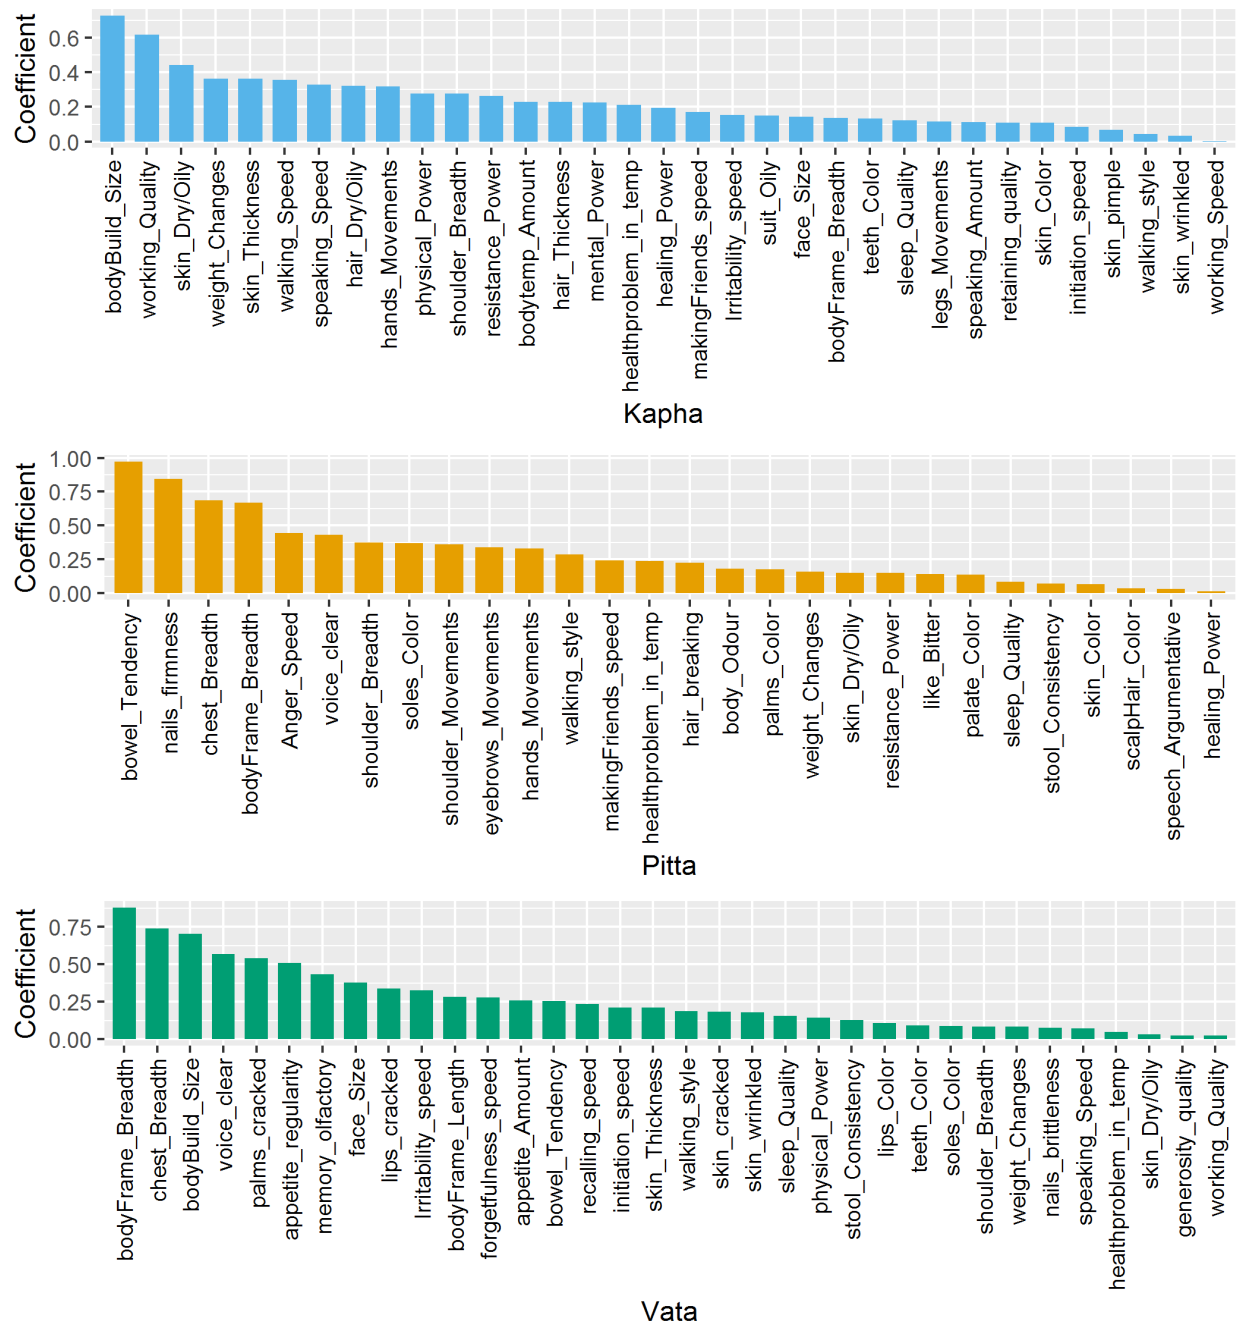

**Figure S7: Important variable plot for 61 variables from elastic net model:** Plot represents *Prakriti* wise important variables. Y-axis represents the absolute value of the coefficient for the features selected from elastic net model. These features are superset of features selected from LASSO model.
