# Supplementary material for: Recapitulation of Ayurveda constitution types by machine learning of phenotypic traits
Source: PLOS journal article supplement (doi:10.1371/journal.pone.0185380), 2017-10-05
Supplement: S8 (10.1371/journal.pone.0185380.s008) [file journal.pone.0185380.s008]

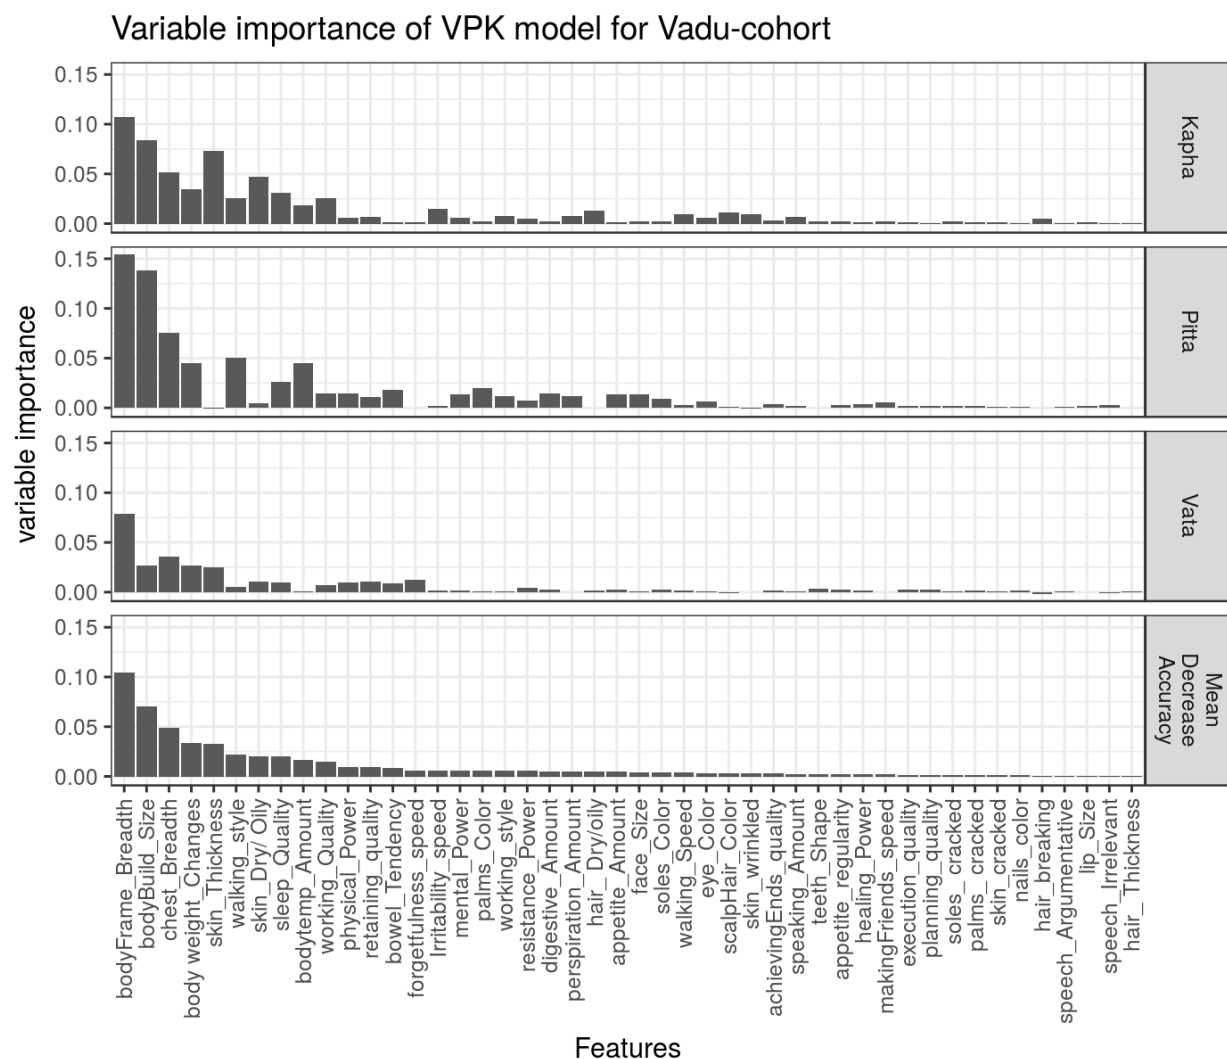

**Figure S8: Important variable plot for 59 variables from random forests model:** Random forests algorithm provides variable importance for overall model as well as for class-wise. Variables with large mean decrease accuracy represents more importance to discriminate among *Prakriti* classes.
